# Supplementary material
Source: Royal Society of Chemistry journal article supplement (doi:10.1039/d6cp00544f)
Supplement: d6cp00544f1.pdf [file d6cp00544f1.pdf]

## Supporting Information

### Elucidating the structure and binding nature of thianaphthene dimers using gas-phase infrared spectroscopy

Gaia Zucali<sup>1</sup>, Vincent J. Esposito<sup>2</sup>, Sandra Brünken<sup>1,3</sup> and Piero Ferrari<sup>1</sup>

<sup>1</sup> HFML-FELIX, Nijmegen 6525 ED, The Netherlands

<sup>2</sup> Schmid College of Science and Technology, Chapman University, Orange, CA 92866, USA

<sup>3</sup> Institute for Molecules and Materials, Radboud University, Nijmegen, the Netherlands

#### Content

1. Full mass spectrum of thianaphthene clusters
2.  $\pi$ -stacked conformations and relative energies
3. Computed vibrational spectra of the  $\pi$ -stacked conformations
4. Comparison of IR spectra of monomer and dimer

#### 1. Full mass spectrum of thianaphthene clusters

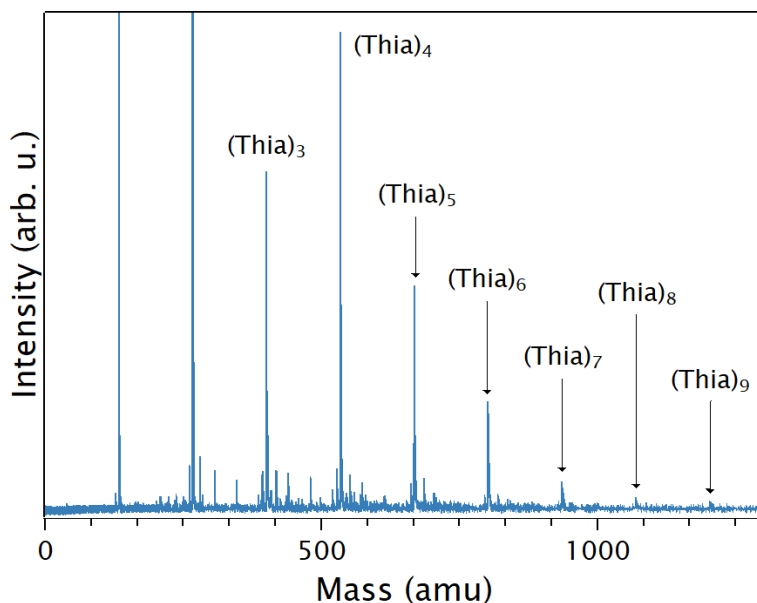

Figure S1. Mass spectrum of neutral thianaphthene clusters in the molecular beam, constructed as the average over all scanned REMPI resonances. The first two peaks correspond to (Thia)1 and (Thia)2, out of scale in the figure.

## 2. $\pi$ -stacked conformations and relative energies

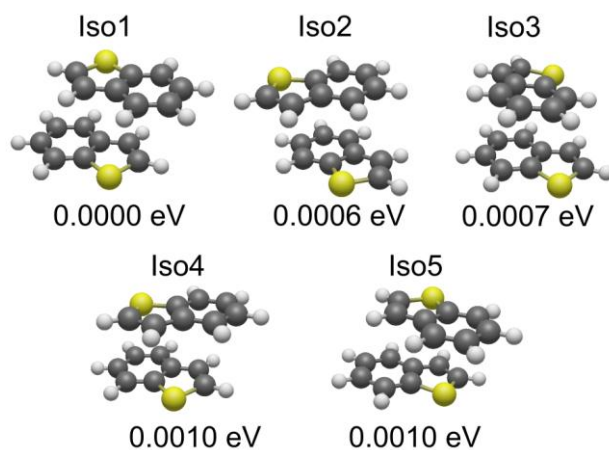

Figure S2.  $\pi$ -stacked conformations and relative energies of the thianaphthene dimer.

## 3. Computed vibrational spectra of the $\pi$ -stacked conformations

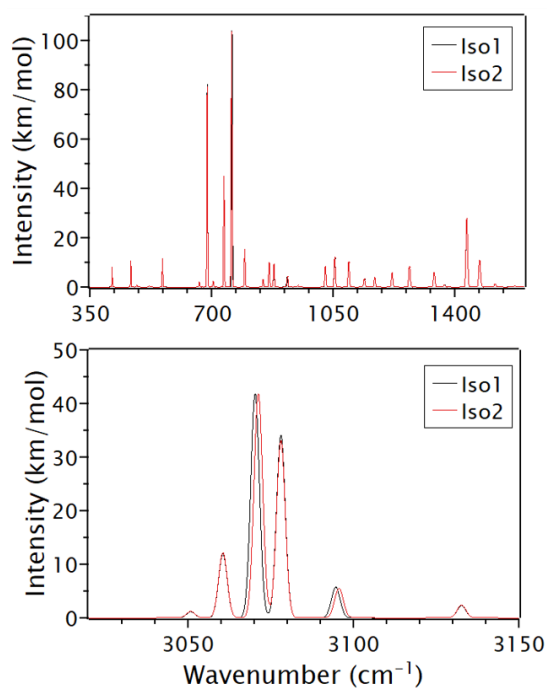

Figure S3. Vibrational spectra of Iso1 and Iso2 of the  $\pi$ -stacked conformations for the thianaphthene dimer.

#### 4. Comparison of IR spectra of monomer and dimer

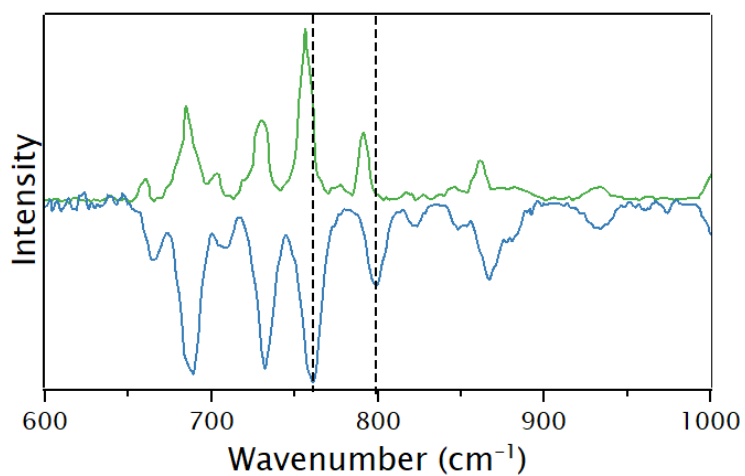

Figure S4. Comparison of the IR spectra of thianaphthene dimer and monomer in the region between 600 and 1000  $\text{cm}^{-1}$ . For visualization purposes, the spectrum of the monomer is multiplied by -1. Vertical dashed lines are included to help visualize small differences in the spectra.
